1 **The evolution of neurosensation drives the gain and loss of phenotypic plasticity**

2

3 Emily Y. Chen<sup>1,2\*</sup>, and Diane K. Adams<sup>2</sup>

4 <sup>1</sup> Institute of Oceanography, Polish Academy of Sciences, Powstańców Warszawy 55, 81-712  
5 Sopot, Poland

6 <sup>2</sup> Department of Marine and Coastal Sciences, Rutgers, the State University of New Jersey, 71  
7 Dudley Road, New Jersey USA 08901

8

9 \*Corresponding author email: [emily@iopan.pl](mailto:emily@iopan.pl)

10

11 **Key words:** phenotypic plasticity, evolution, sea urchin, neurosensation, larvae

12

13 **Abstract**

14 Phenotypic plasticity is widely regarded as important for enabling species resilience to  
15 environmental change and for species evolution. However, insight into the complex mechanisms  
16 by which phenotypic plasticity evolves in nature has been limited by our ability to reconstruct  
17 evolutionary histories of plasticity. By using part of the molecular mechanism, we were able to  
18 trace the evolution of pre-feeding phenotypic plasticity across the class Echinoidea and identify  
19 the origin of plasticity at the base of the regular urchins. The neurosensory foundation for plasticity  
20 was ancestral within the echinoids. However, coincident development of the plastic trait and the  
21 neurosensory system was not achieved until the regular urchins, likely due to pleiotropic effects  
22 and linkages between the two colocalized systems. Plasticity continues to evolve within the urchins  
23 with numerous instances of losses associated with loss of sensory capabilities and in one case loss  
24 of neurons, consistent with a cost associated with maintaining these capabilities. Thus, evidence  
25 was found for the neurosensory system providing opportunities and constraints to the evolution of  
26 phenotypic plasticity.

27

## NEUROSENSATION DRIVES PLASTICITY

### 28 **Introduction**

29 Phenotypic plasticity is one of the most common phenomena of the living world (Pigliucci, 2005).  
30 Plasticity allows an individual to produce different phenotypes (forms, functions, or behaviors)  
31 from the same genotype. This environmentally-induced phenotypic variation contributes the  
32 overall variation that serves as the material for natural selection, facilitates invasion of new  
33 habitats, and enables acclimatization to variable environments (Pfennig et al., 2010; Agrawal,  
34 2001). In addition to contributing to species and trait evolution, plasticity is also a trait subject to  
35 evolutionary processes. Because phenotypic plasticity requires genetically encoded molecular and  
36 cellular machinery to sense and induce changes in phenotypes, the ability to be plastic or not is  
37 heritable and subject to selection pressure. Consistent with this, the rate and magnitude of the  
38 response to the environment – i.e., the shape of the reaction norms – can differ between genotypes  
39 (Murren et al., 2015) and can be experimentally evolved (Scheiner, 2002; Garland and Kelly,  
40 2006).

41 There are constraints – costs and limits – to the evolution of phenotypic plasticity that  
42 prevent achieving the ideal phenotype for a given environment and may prevent a trait from being  
43 plastic at all (Murren et al., 2015; DeWitt, et al., 1998). Generally, processes that hinder trait  
44 evolution such as limited genetic variation and gene flow will also hinder the evolution of plasticity  
45 (Schlichting and Pigliucci, 1998). Pleiotropic effects in which a gene for one trait is linked to a  
46 gene for plasticity of another trait can also limit an evolutionary response. The molecular and  
47 cellular machinery (enzymes, signaling molecules, etc.) required to detect the environment,  
48 process information, and invoke a structural response have costs to the organism (Murren et al.,  
49 2015; DeWitt et al., 1998). If these costs are substantial relative to any adaptive advantage,  
50 plasticity may be selected against and subsequently lost.

51 The neurosensory machinery required to detect the environment is likely to be one of the  
52 main costs of plasticity and could also limit the evolution of plasticity (Snell-Rood, 2013).  
53 However, despite recent attention to the costs of plasticity, quantification of costs has been  
54 challenging and evidence for a significant cost is limited (Van Kleunen and Fischer, 2005; Van  
55 Buskirk and Steiner, 2009; Steiner and Van Buskirk, 2008; Auld et al., 2009). Interpopulation  
56 comparisons suggest that sensory capabilities can evolve over ecological timescales (Tsuji et al.,  
57 2011; Bay and Palumbi, 2014). Further, rapid radiations of sensory receptor genes (Nei et al., 2008;

## NEUROSENSATION DRIVES PLASTICITY

58 Nozawa et al., 2007; Raible et al., 2006) and plasticity in neural networks (Abbott and Nelson,  
59 2000; Andersen, 2003) could reduce any potential limitation. Thus, changes to existing  
60 neurosensory infrastructure may present evolutionary opportunities.

61 A comparative approach that characterizes the natural evolution of plasticity across taxa  
62 would allow for testing these hypotheses regarding the costs, limits and opportunities for plasticity.  
63 For example, if neurosensory components are costly, then losses of phenotypic plasticity to be  
64 associated with losses or simplifications of the nerves or sensory receptor repertoire would be  
65 expected. However, it can be difficult to take the first step of tracing the evolution of plasticity  
66 across phylogenies due to ambiguity between loss of plasticity and an ancestral state before  
67 plasticity (i.e., plasticity has not yet evolved). This challenge can be surmounted when part or all  
68 of the mechanism of plasticity is known. Though plasticity itself may be lost, remnants of the  
69 mechanism are likely to remain due to diminished selection pressure. For example, if predator-  
70 induced plasticity is lost in a species or line of *Daphnia*, artificially-induced expression of juvenile  
71 hormone may still produce a phenotype that mimics the predator-induced form (Miyakawa et al.,  
72 2010; Dennis et al., 2014).

73 We take advantage of knowledge of part of the mechanism for phenotypic plasticity in sea  
74 urchin larvae. The feeding structure of many species of sea urchin vary with food concentration  
75 throughout larval development, including during the pre-feeding stage (Boidron-Metairon, 1998;  
76 Miner, 2007; Hart and Strathmann, 1994; Byrne et al., 2008; Sewell et al. 2004). When food is  
77 abundant, post-oral arm length is shorter. When food is scarce, post-oral arm length is longer.  
78 Plasticity during the pre-feeding stage must be sensory driven, since food is not yet ingested  
79 (Miner, 2007; Adams et al., 2011). Although the sensory receptor remains unknown, it has been  
80 established that sensation of food initiates a dopamine signal which is received by a dopamine  
81 type-2 receptor to inhibit post-oral arm elongation; this optimizes arm development and associated  
82 feeding potential relative to maternal lipid expenditure (Adams et al., 2011). There are distinct  
83 phylogenetic limits to when this phenotypic plasticity in arm elongation could have first evolved  
84 in echinoderms. While both Echinoidea (urchins and sand dollars) and Ophiuroidea (brittle stars)  
85 have a pluteus larval form with skeletal supports, morphological and molecular phylogenies  
86 support these as convergent forms that evolved independently (Williamson, 2003; McIntyre et al.,

## NEUROSENSATION DRIVES PLASTICITY

87 2014; Littlewood and Smith, 1995). Thus, it is likely that the plasticity of the pluteus feeding arms  
88 (including the skeletal elements), also evolved independently.

89 Here, the gains and losses of pre-feeding phenotypic plasticity were traced across the  
90 echinoids using not only the phenotypic outcome but also part of the underlying developmental  
91 signaling mechanism to identify the origin of pre-feeding plasticity. The evolutionary dynamics of  
92 pre-feeding plasticity were characterized in arm elongation to test the hypothesis that  
93 neurosensation of the environmental cue constrains the evolution plasticity.

### 94 **Results**

#### 95 *Genesis of Phenotypic Plasticity*

96 We surveyed echinoids for the pre-feeding response to food to determine when phenotypic  
97 plasticity evolved. Molecular and morphological data place cidaroids as the most basal extant taxa  
98 within Echinoidea (Littlewood and Smith, 1995; Kroh and Smith, 2010; Smith et al., 2006). We  
99 did not find evidence of shortened post-oral arms in the presence of food in the cidaroid *Euclidaris*  
100 *tribuloides* (Figure 1, Table 1). The lack of pre-feeding plasticity in *E. tribuloides* is not  
101 unexpected, due to a temporal mismatch between the timing of arm elongation and the onset of  
102 feeding. *E. tribuloides* begins feeding before the post-oral arms have substantially elongated.  
103 These results support a more recent origin of plasticity within the Echinoids.

104 Irregular urchins have elongated arms during the pre-feeding stage and some are known to  
105 alter the length of their post-oral arms in response to food after feeding starts (Boidron-Metairon,  
106 1988; Reitzel and Heyland, 2007). However, we did not observe the canonical plastic response in  
107 any of the irregular species tested, *Echinarachnius parma*, *Dendraster excentricus*, *Encope*  
108 *michelini*, and *Leodia sexiesperforata* (Figure 1). Post-oral arm lengths were significantly different  
109 in the presence of food for the keyhole sand dollars *E. michelini* (Student's t-test,  $p < 0.001$ ) and  
110 *L. sexiesperforata* ( $F_{2,125} = 15.697$ ,  $p < 0.001$ ) (Figure 1, Table 1). However, the response was in  
111 the opposite direction of the previously described canonical response. Those larvae exposed to  
112 abundant food had significantly longer post-oral arms than those without food. This elongation  
113 may be a specific response of the keyhole sand dollars (Mellitidae), although changes in post-oral  
114 arm length in response to food concentration followed a similar, but non-significant trend for *E.*  
115 *parma* ( $F_{2,213} = 1.434$ ,  $p = 0.241$ , Table 1).

## NEUROSENSATION DRIVES PLASTICITY

116 Surprisingly, pre-feeding plasticity was not detected for the common sand dollar *D.*  
117 *excentricus* in our experiments (Fig 1,  $F_{1,115} = 1.010$ ,  $p = 0.316$ ). *D. excentricus* has demonstrable  
118 phenotypic plasticity after feeding starts (Boidron-Metairon, 1988; Hart and Strathmann, 1994)  
119 and has been previously reported to have the canonical pre-feeding response (Miner, 2007). The  
120 differences between our observations and those of Miner, (2007) could be due to the different  
121 populations tested (Goleta, CA vs Orcas Island, WA) or our ability to detect the small magnitude  
122 of change (~5 % reduction). However, the lack of the canonical plasticity in *D. excentricus* is  
123 consistent with the results for the other irregular urchins.

124 Significant pre-feeding phenotypic responses to food abundance were only detected within  
125 the regular urchins. *Arbacia punctulata*, *Lytechinus variegatus*, and *Strongylocentrotus purpuratus*  
126 all had significantly shorter post-oral arm lengths in the presence of high food (Figure 2, Table 2).  
127 Three other taxa tested, *Echinometra lucunter*, *Lytechinus pictus*, and *Lytechinus variegatus*  
128 *carolinus*, did not significantly respond to changes in food concentration (Figure 2, Table 2). The  
129 basal position of *A. punctulata* within the regular urchins supports the interpretation that plasticity  
130 is ancestral within the clade and that there have been multiple losses. However, the alternative of  
131 multiple convergent evolutionary events within the regular urchins is also a possibility based on  
132 these data.

### 133 ***Remnant Signaling Mechanism***

134 To distinguish between evolutionary losses and convergent gains, *E. lucunter*, *L. pictus*, and *L.*  
135 *variegatus carolinus* were tested to see if they still retained a phenotypic response to activation of  
136 dopamine type-D<sub>2</sub> receptors (DRD2) even though they had lost the response to food. Dopamine  
137 signaling through DRD2 is required for the presence of food to inhibit arm elongation in the regular  
138 urchin *S. purpuratus* (Adams et al., 2011). If plasticity is ancestral within the regular urchins, we  
139 would expect that all of the regular urchins would use this same neural signaling mechanism and  
140 that even those that lost the plastic response might still retain this signaling remnant. Alternatively,  
141 if plasticity evolved convergently multiple times, differences are expected in the neural signaling  
142 mechanism and no response to dopamine signaling in those species without plasticity. Consistent  
143 with an ancestral origin within the regular urchins, activation of dopamine type-D<sub>2</sub> receptors with  
144 the selective agonist, quinpirole, inhibited post-oral arm elongation in all of the regular urchins  
145 tested, including those without the response to food (Figure 3).

## NEUROSENSATION DRIVES PLASTICITY

### 146 *Dopaminergic neural development*

147 To test whether neural development constrained the evolution of phenotypic plasticity, we  
148 characterized the temporal and spatial development of putative dopaminergic neurons (TH-  
149 positive) throughout Echinoidea. The member of the most basal group, *E. tribuloides*, developed  
150 TH-positive lateral ganglia near the future post-oral arms before feeding and before arm elongation  
151 (Figure 4A). After feeding starts, TH-positive neurons are also detected in the oral ganglia around  
152 the mouth and associated with the stomach. Thus, the requisite neural developmental systems were  
153 in place ancestrally, before the evolution of pre-feeding plasticity.

154 However, the irregular urchins investigated have altered dopaminergic development  
155 (Figure 4B-D). Tyrosine hydroxylase first appears after feeding begins in *D. excentricus*, *E.*  
156 *parma*, and *E. michelini*. In both *D. excentricus* and *E. parma*, TH-positive neurons are detected  
157 in the mouth and gut, but not as lateral ganglia near the post-oral arms. Since we can detect TH-  
158 positive cells in the mouth and gut, we do not believe that the absence of TH-positive lateral  
159 ganglia is due to a detection issue. The lack of early dopaminergic lateral ganglia is consistent with  
160 the lack of feeding arm plasticity detected within the irregular urchins (Figure 1) and suggests that  
161 neural development may have constrained the evolution of pre-feeding plasticity within this clade.

162 Only within regular urchins does the development of the post-oral arms and TH-positive  
163 neurons coincide during the pre-feeding stage. Lateral dopaminergic neurons developed during the  
164 prism stage, at approximately the time of arm elongation in *A. punctulata*, *L. pictus*, *L. variegatus*,  
165 *L. variegatus carolinus*, and *S. purpuratus* (Figure 5). At the onset of feeding, TH-positive neurons  
166 appear around the mouth as oral ganglia and begin to appear in the stomach. The number of TH-  
167 positive neurons associated with lateral ganglia near the post oral arms, vary between species. Both  
168 *A. punctulata* and *L. variegatus* subspp. develop multiple TH-positive neurons along the post-oral  
169 arms. Fewer TH-positive neurons develop in *L. pictus* and the shorter *S. purpuratus* arms.  
170 *Echinometra lucunter* is the exception – this species does not develop TH-positive neurons until  
171 post-feeding and even then, the lateral ganglia appear to be absent. This change in neural  
172 development may be responsible for the loss in pre-feeding phenotypic plasticity in *E. lucunter*.  
173 Thus, multiple distinct changes in neural development – timing (heterochrony), number  
174 (heterometry), and location (heterotopy) – could have contributed to the evolutionary constraints  
175 and opportunities for pre-feeding phenotypic plasticity in sea urchin larvae.



176 **Discussion**

177 ***Origin of Pre-feeding Phenotypic Plasticity***

178 The data suggest that pre-feeding phenotypic plasticity of the post-oral arms arose in the regular  
179 urchins and has continued to evolve within the clade. While there were significant responses to  
180 food for some irregular urchins, the response was in the opposite direction of the established  
181 response. Consistent with this departure from the plastic response observed in regular urchins, all  
182 of the irregular urchins lacked putative dopaminergic neurons in the lateral ganglia during the pre-  
183 feeding stage. This includes *Dendraster excentricus* which was previous reported to have a subtle  
184 pre-feeding response to food (Miner, 2007). However, *D. excentricus* and *S. purpuratus* responded  
185 morphologically to different cues (soluble vs algal bound, respectively), which is consistent with  
186 convergent evolution (Miner, 2007).

187 An evolutionary origin of pre-feeding plasticity at the base of the regular urchins is in  
188 contrast to phenotypic plasticity that occurs after feeding starts, when additional and more reliable  
189 cues, such as metabolic byproducts, could be used to assess food availability. Feeding plasticity  
190 has not been reported for any of the basal echinoids tested to date (2 of 2 cidaroids (McAlister,  
191 2008) and 3 of 3 diademids (McAlister, 2008; Soars et al., 2009)). However, both the irregular (3  
192 of 5 species (Boidron-Metairon, 1988; Hart and Strathmann, 1994; Reitzel and Heyland, 2007;  
193 Eckert, 1995)) and regular (9 of 12 species (Miner and Vonesh, 2004; Strathmann et al., 1992;  
194 Poorbagher et al., 2010; Bertram and Strathmann, 1998; Miner, 2005; McAlister, 2007)) urchins  
195 have taxa that exhibit phenotypic responses to food after feeding starts. Interestingly, the two  
196 species of irregular urchins reported to lack feeding plasticity are the mellitid keyhole sand dollars  
197 *E. michelini*, and *L. sexiesperforata*, which also lacked canonical pre-feeding plasticity here  
198 (Reitzel and Heyland, 2007). Similarly, the three species of regular urchins lacking post-feeding  
199 plasticity were species in the genus *Echinometra*, including *E. lucunter*, which also lacked  
200 canonical pre-feeding plasticity here (McAlister, 2008). This may be a recent loss isolated to the  
201 genus *Echinometra*, as feeding plasticity was reported in the Echinometrid *Heliocidaris*  
202 *tuberculata* (Soars et al, 2009). Knowledge of the mechanism(s) underlying plasticity during the  
203 planktonic feeding stage would again provide the ability to discriminate between evolutionary  
204 losses and multiple convergent gains.

205 ***Evolutionary Opportunity and Constraint by Neural Systems***

## NEUROSENSATION DRIVES PLASTICITY

206 The results suggest that development of the dopaminergic neurons in the lateral ganglia was  
207 already in place within the ancestral echinoids, the cidaroids. This provides a foundational  
208 component that could have later facilitated the evolution of pre-feeding phenotypic plasticity.  
209 However, in the cidaroids, post-oral arm elongation does not occur until days after feeding starts,  
210 so the timing of skeletal elongation may have been an ancestral constraint on the evolution of pre-  
211 feeding plasticity.

212 We propose that pleiotropic effects or gene linkage associated with the temporal shift in  
213 arm elongation, altered development of the dopaminergic neurons in the lateral ganglia (Figure 6).  
214 This would explain the loss or temporal shift in development of dopaminergic lateral ganglia in  
215 the irregular urchins investigated. The lateral ganglia develops within the lateral/boundary  
216 ectoderm, where epithelial-mesenchymal signaling is known to coordinate skeletal elongation  
217 (McIntyre et al., 2013, 2014; Adomako-Ankomah and Ettensohn, 2013; Duloquin et al., 2007;  
218 Ettensohn, 2009). Thus, it is possible that changes in the signaling milieu to advance skeletal  
219 elongation could have suppressed dopaminergic development. In support of this, many of the genes  
220 within the skeletogenic gene regulatory network (Rafiq, 2014), including FGF, Pax 2/5/8, Wnt5,  
221 and Otp (McIntyre et al., 2013; Röttinger et al., 2008; Cavalieri et al., 2003), also have roles in  
222 dopaminergic development in other systems (Hegarty et al., 2013; Ryu et al., 2007; Smidt et al.,  
223 2003). A decoupling of gene expression or function in the regular urchins would be necessary to  
224 allow for the coincident development of dopaminergic lateral ganglia and the post-oral arms during  
225 the pre-feeding stage. The loss of plasticity in the regular urchin *E. lucunter* could represent a  
226 reversion to the irregular-like state with early skeletal elongation and delayed neural development.  
227 Thus, dynamic changes in the development of the lateral ganglia throughout echinoidea are likely  
228 to have both constrained and provided opportunity for plasticity.

### 229 *Evolution of Neurosensation*

230 Changes in neural development cannot account for the differences in plasticity within all of the  
231 regular urchins. *L. variegatus carolinus* and *L. pictus* develop TH-positive cells at the appropriate  
232 time and place (Figure 5 B, C) and respond to activation of DRD2 (Figure 3 B, C). However, they  
233 lack the pre-feeding phenotypic response to food concentration (Figure 2). This suggests that the  
234 change responsible for the loss of plasticity occurred upstream of the dopamine receptor – during  
235 the neurosensory process.



## NEUROSENSATION DRIVES PLASTICITY

236           Given that there is evidence for rapid evolution of putative sensory receptors in sea urchins  
237 (Raible et al. 2006) that could affect developmental plasticity, we hypothesize that changes in  
238 sensory receptor expression or sequence caused the loss of arm plasticity. Sea urchins have a large  
239 repertoire of GPCRs and immune receptors that could act in the sensation of food (Rast et al.,  
240 2006; Hibino et al., 2006). Both immunity receptors and GPCRs are often found in large tandem  
241 arrays of genes and pseudogenes suggestive of gene duplications. In the purple sea urchin, 979  
242 GPCRs have been identified – comprising nearly 3% of the predicted proteins. Two groups of  
243 these GPCRs have rapidly expanded and are most similar to vertebrate olfactory receptors (Raible  
244 et al., 2006). Although innate immunity receptors are generally believed to have ancient origins  
245 and minimal subsequent evolution, there is genomic evidence from sea urchins for extensive  
246 radiations in this group as well, with 10-20 fold more genes in the purple sea urchin than in humans  
247 (Rast et al., 2006; Hibino et al., 2006). Rapid evolution of sensory receptors is also consistent with  
248 the recent evolutionary loss of the response between relatively close sister species (~3 million  
249 years) and subspecies (less than a million years) in the genus *Lytechinus* (Zigler and Lessios,  
250 2004). However, the identity of the sensory receptor and its evolution remains to be determined.

### 251 **Conclusion**

252 The data demonstrate the power of a comparative approach to understand the evolutionary  
253 dynamics of phenotypic plasticity when part of the molecular mechanism is known. Once within  
254 an evolutionary context, we were able to assess the role of neural development in constraining the  
255 evolution of plasticity. In this case, ancestral neural development provided a foundational  
256 opportunity, rather than constraint. Instead, we propose that interactions between neural  
257 development and development of the plastic trait constrained the rise of phenotypic plasticity and  
258 decoupling was necessary to allow for the advent of plasticity. Once established, phenotypic  
259 plasticity has continued to evolve dynamically both through changes in neural development and  
260 potentially evolution of sensory receptors.

261

262

## NEUROSENSATION DRIVES PLASTICITY

### 263 **Materials & Methods**

#### 264 *Embryo and larval culture*

265 Adult echinoids were obtained from the following vendors for broodstock: *Lytechinus variegatus*  
266 (Tom's Caribbean and Reeftopia, Florida Keys, FL), *L. variegatus carolinus* (Duke Marine Labs,  
267 Beaufort, NC), *L. pictus* (Marinus, Goleta, CA), *Echinometra lucunter* (Reeftopia, Florida Keys,  
268 FL), *Arbacia punctulata* (Gulf Specimen Marine Lab, Panacea, FL and Duke Marine Lab,  
269 Beaufort, NC), *Dendraster excentricus* (Marinus Scientific, Goleta, CA), *Echinarachnius parma*  
270 (MBL, Woods Hole, MA), *Encope michelini* (Reeftopia, Florida Keys, FL), *Leodia*  
271 *sexiesperformata* (Reeftopia, Florida Keys, FL), and *Eucidaris tribuloides* (Tom's Caribbean and  
272 Reeftopia, Florida Keys, FL). Gametes were obtained using intracoelomic injections of 0.55 M  
273 KCl. Embryos were cultured using standard methods at densities of 1-5 embryos ml<sup>-1</sup> in artificial  
274 seawater (ASW) at 21 °C for tropical species or 15 °C for temperate species. Larvae were treated  
275 with 5,000, 7,500 or 10,000 cells ml<sup>-1</sup> of the algae *Dunaliella* sp. to assay for the developmental-  
276 response to food. Algal concentration was determined using a hemocytometer. Larvae of the  
277 regular echinoids were also treated with the specific type-D<sub>2</sub> receptor agonist (Maggio and Millan,  
278 2010), quinpirole, at late gastrula stage or prism stage to test for conservation of the dopamine-  
279 signaling mechanism. Doses of 0, 25, and 50 μM were used. The highest dose was decreased to  
280 37.5 μM for *L. pictus* due to sickness in this species at 50 μM.

#### 281 *Quantification of skeletal lengths*

282 Post-oral arm and body rod lengths were assayed just before feeding begins as in Adams et al.,  
283 (2011). The time post fertilization varied with each species and was experimentally determined by  
284 observing algal particles within the gut. All collections were done when algae were observed in  
285 less than 50% of the larvae's guts. Larvae were randomly sampled from each treatment, such that  
286 sample sizes varied but all were  $n \geq 20$  individuals each. Larvae were squash mounted on  
287 microscope slides to position the skeletal elements in the same plane, then imaged on a Zeiss  
288 Axiovert 200M or Zeiss Axiovert A1 inverted microscope at 20x under differential interference  
289 contrast (DIC) which readily identifies the birefringent skeletal elements. The skeletal lengths were  
290 quantified from the digital images using Zen Lite software (Carl Zeiss MicroImaging).

#### 291 *Statistical Analyses*

## NEUROSENSATION DRIVES PLASTICITY

292 The response of post-oral arm length to algal and quinpirole treatments was assessed using a two-  
293 way ANCOVA, where perturbation treatment (food or quinpirole) and biological replicate (male-  
294 female cross) were fixed effects. Body rod length was included as a covariate. We used post-hoc  
295 Bonferroni-corrected pair-wise comparisons when effects were significant at  $p < 0.05$ .  
296 Experiments were replicated with two or more sets of non-related full siblings (male-female  
297 crosses) for all species except *E. michelini* and *L. sexiesperformata*, due to limitations in obtaining  
298 ripe broodstock. For these species, only one male and female were available yielding one set of  
299 full siblings; thus, a one-way ANOVA (*E. michelini*) or Student's two-tailed t-tests (*L.*  
300 *sexiesperformata*) were used. All datasets were determined to be normal based on probability  
301 distribution plots. All statistical analyses were done in SYSTAT v10 with output to three decimal  
302 places, thus exact  $P$  values are given if  $P > 0.001$ .

### 303 ***Immunofluorescent staining***

304 Immunostains for tyrosine hydroxylase (1:200, ImmunoStar #22941) were performed as in Adams  
305 et al., (2011) on two stages of larvae: 1) just after the initial elongation of the post-oral arms and  
306 2) after feeding started. When tyrosine hydroxylase was not detected at these developmental  
307 stages, later stage larvae were also assayed to ensure that the antibody worked in all species tested.  
308 Specificity of the antibody in echinoids was established in *S. purpuratus* by morpholino knock  
309 down of tyrosine hydroxylase. Larvae were imaged using a Zeiss Axiovert 200M epifluorescent  
310 inverted microscope with an optically sectioning ApoTome unit or Zeiss LSM 710 Confocal  
311 microscope at 20x or 40x. Stacked images were prepared using Imaris (Bitplane Inc., St. Paul,  
312 MN).

313

314

## References

- Abbott, L. F. and Nelson, S. B.** (2000). Synaptic plasticity: taming the beast. *Nature Neuroscience* **3**, 1178-1183.
- Adomako-Ankomah, A. and Ettensohn, C. A.** (2013). Growth factor-mediated mesodermal cell guidance and skeletogenesis during sea urchin gastrulation. *Development* **140**, 4214-4225.
- Agrawal, A. A.** (2001). Phenotypic plasticity in the interactions and evolution of species. *Science* **294**, 321-326.
- Andersen, S. L.** (2003). Trajectories of brain development: point of vulnerability or window of opportunity? *Neuroscience & Biobehavioral Reviews* **27**, 3-18.
- Adams, D. K., Sewell, M. A., Angerer, R. C. and Angerer, L. M.** (2011). Rapid adaptation to food availability by a dopamine-mediated morphogenetic response. *Nature Communications* **2**, 592.
- Auld, J. R., Agrawal, A. A. and Relyea, R. A.** (2009). Re-evaluating the costs and limits of adaptive phenotypic plasticity. *Proceedings of the Royal Society of London B: Biological Sciences*, rspb20091355.
- Bay, R. A. and Palumbi, S. R.** (2014). Multilocus adaptation associated with heat resistance in reef-building corals. *Current Biology* **24**, 2952-2956.
- Bertram, D. F. and Strathmann, R. R.** (1998). Effects of maternal and larval nutrition on growth and form of planktotrophic larvae. *Ecology* **79**, 315-327.
- Boidron-Metairon, I. F.** (1988). Morphological plasticity in laboratory-reared echinoplutei of *Dendraster excentricus* (Eschscholtz) and *Lytechinus variegatus* (Lamarck) in response to food conditions. *Journal of Experimental Marine Biology and Ecology* **119**, 31-41.
- Byrne, M., Sewell, M. and Prowse, T.** (2008). Nutritional ecology of sea urchin larvae: influence of endogenous and exogenous nutrition on echinopluteal growth and phenotypic plasticity in *Tripneustes gratilla*. *Functional Ecology* **22**, 643-648.

- Cavaliere, V., Spinelli, G. and Di Bernardo, M.** (2003). Impairing Otp homeodomain function in oral ectoderm cells affects skeletogenesis in sea urchin embryos. *Developmental biology* **262**, 107-118.
- Dennis, S. R., LeBlanc, G. A. and Beckerman, A. P.** (2014). Endocrine regulation of predator induced phenotypic plasticity. *Oecologia* **176**, 625-635.
- DeWitt, T. J., Sih, A. and Wilson, D. S.** (1998). Costs and limits of phenotypic plasticity. *Trends in ecology & evolution* **13**, 77-81.
- Duloquin, L., Lhomond, G. and Gache, C.** (2007). Localized VEGF signaling from ectoderm to mesenchyme cells controls morphogenesis of the sea urchin embryo skeleton. *Development* **134**, 2293-2302.
- Eckert, G. L.** (1995). A novel larval feeding strategy of the tropical sand dollar, *Encope michelini* (Agassiz): adaptation to food limitation and an evolutionary link between planktotrophy and lecithotrophy. *Journal of experimental marine biology and ecology* **187**, 103-128.
- Ettensohn, C. A.** (2009). Lessons from a gene regulatory network: echinoderm skeletogenesis provides insights into evolution, plasticity and morphogenesis. *Development* **136**, 11-21.
- Garland, T. and Kelly, S. A.** (2006). Phenotypic plasticity and experimental evolution. *Journal of Experimental Biology* **209**, 2344-2361.
- Hart, M. W. and Strathmann, R. R.** (1994). Functional consequences of phenotypic plasticity in echinoid larvae. *The Biological Bulletin* **186**, 291-299.
- Hegarty, S. V., Sullivan, A. M. and O'Keeffe, G. W.** (2013). Midbrain dopaminergic neurons: a review of the molecular circuitry that regulates their development. *Developmental biology* **379**, 123-138.
- Hibino, T., Loza-Coll, M., Messier, C. Majeske, A. J., Cohen, A. H., Terwilliger, D. P., Buckley, K. M., Brockton, V., Nair, S. V., Berney, K., et al.** (2006). The immune gene repertoire encoded in the purple sea urchin genome. *Developmental biology* **300**, 349-365.

- Kroh, A. and Smith, A. B.** (2010). The phylogeny and classification of post-Palaeozoic echinoids. *Journal of Systematic Palaeontology* **8**, 147-212.
- Littlewood, D. and Smith, A.** (1995). A combined morphological and molecular phylogeny for sea urchins (Echinoidea: Echinodermata). *Philosophical Transactions of the Royal Society B: Biological Sciences* **347**, 213-234 (1995).
- Maggio, R. and Millan, M. J.** (2010). Dopamine D2-D3 receptor heteromers: pharmacological properties and therapeutic significance. *Curr. Opin. Pharmacol.* **10**, 100-107.
- McAlister, J. S.** (2008). Evolutionary responses to environmental heterogeneity in Central American echinoid larvae: plastic versus constant phenotypes. *Evolution* **62**, 1358-1372.
- McAlister, J. S.** (2007). Egg size and the evolution of phenotypic plasticity in larvae of the echinoid genus *Strongylocentrotus*. *Journal of Experimental Marine Biology and Ecology* **352**, 306-316.
- McIntyre, D. C., Lyons, D. C., Martik, M. and McClay, D. R.** (2014). Branching out: origins of the sea urchin larval skeleton in development and evolution. *Genesis* **52**, 173-185.
- McIntyre, D. C., Seay, N. W., Croce, J. C. and McClay, D. R.** (2013). Short-range Wnt5 signaling initiates specification of sea urchin posterior ectoderm. *Development* **140**, 4881-4889.
- Miner, B. G.** (2007). Larval feeding structure plasticity during pre-feeding stages of echinoids: not all species respond to the same cues. *Journal of Experimental Marine Biology and Ecology* **343**, 158-165.
- Miner, B. G.** (2005). Evolution of feeding structure plasticity in marine invertebrate larvae: a possible trade-off between arm length and stomach size. *Journal of experimental marine biology and ecology* **315**, 117-125.
- Miner, B. G. and Vonesh, J. R.** (2004). Effects of fine grain environmental variability on morphological plasticity. *Ecology Letters* **7**, 794-801.
- Miyakawa, H., Imai, M., Sugimoto, N., Ishikawa, Y., Ishikawa, A., Ishigaki, H., Okada, Y., Miyazaki, S., Koshikawa, S., Cornette, R. et al.** (2010). Gene up-regulation in response



to predator kairomones in the water flea, *Daphnia pulex*. *BMC Developmental Biology* **10**, 1.

**Murren, C. J., Auld, J. R., Callahan, H., Ghalambor, C. K., Handelsman, C. A., Heskell, M. A., Kingsolver, J. G., Maclean, H. J., Masel, J., Maughan, H., et al.** (2015). Constraints on the evolution of phenotypic plasticity: limits and costs of phenotype and plasticity. *Heredity* **115**, 293-301.

**Nei, M., Niimura, Y. and Nozawa, M.** (2008). The evolution of animal chemosensory receptor gene repertoires: roles of chance and necessity. *Nature Reviews Genetics* **9**, 951-963.

**Nozawa, M., Kawahara, Y. and Nei, M.** (2007). Genomic drift and copy number variation of sensory receptor genes in humans. *Proceedings of the National Academy of Sciences* **104**, 20421-20426.

**Pfennig, D. W., Wund, M. A., Snell-Rood, E. C., Cruickshank, T., Schlichting, C. D. and Moczek, A. P.** (2010). Phenotypic plasticity's impacts on diversification and speciation. *Trends in ecology & evolution* **25**, 459-467.

**Pigliucci, M.** (2005). Evolution of phenotypic plasticity: where are we going now? *Trends in Ecology & Evolution* **20**, 481-486.

**Poorbagher, H., Lamare, M. D., Barker, M. F. and Rayment, W.** (2010). Relative importance of parental diet versus larval nutrition on development and phenotypic plasticity of *Pseudechinus huttoni* larvae (Echinodermata: Echinoidea). *Marine Biology Research* **6**, 302-314.

**Rafiq, K., Shashikant, T., McManus, C. J. and Ettensohn, C. A.** (2014). Genome-wide analysis of the skeletogenic gene regulatory network of sea urchins. *Development* **141**, 950-961.

**Raible, F., Tessmar-Raible, K., Arboleda, E., Keller, T., Bork, P., Arendt, D. and Arnone, M. I.** (2006). Opsins and clusters of sensory G-protein-coupled receptors in the sea urchin genome. *Developmental biology* **300**, 461-475.

**Rast, J. P., Smith, L. C., Loza-Coll, M., Hibino, T. and Litman, G. W.** (2006). Genomic insights into the immune system of the sea urchin. *Science* **314**, 952-956.

- Reitzel, A. M. and Heyland, A.** (2007). Reduction in morphological plasticity in echinoid larvae: relationship of plasticity with maternal investment and food availability. *Evolutionary Ecology Research* **9**, 109-121.
- Röttinger, E., Saudemont, A., Duboc, V., Besnardeau, L., McClay, D. and Lepage, T.** (2008). FGF signals guide migration of mesenchymal cells, control skeletal morphogenesis and regulate gastrulation during sea urchin development. *Development* **135**, 353-365.
- Ryu, S., Mahler, J., Acampora, D., Holzschuh, J., Erhardt, S., Omodei, D., Simeone, A. and Driever, W.** (2007). Orthopedia homeodomain protein is essential for diencephalic dopaminergic neuron development. *Current biology* **17**, 873-880.
- Scheiner, S.** (2002). Selection experiments and the study of phenotypic plasticity. *Journal of Evolutionary Biology* **15**, 889-898.
- Schlichting, C. D. and Pigliucci, M.** (1998). Phenotypic evolution: a reaction norm perspective. Sunderland, Massachusetts: Sinauer Associates Inc.
- Sewell, M. A., Cameron, M. J. and McArdle, B. H.** (2004). Developmental plasticity in larval development in the echinometrid sea urchin *Evechinus chloroticus* with varying food ration. *Journal of Experimental Marine Biology and Ecology* **309**, 219-237.
- Smidt, M. P., Smits, S. M. and Burbach, J. P. H.** (2003). Molecular mechanisms underlying midbrain dopamine neuron development and function. *European journal of pharmacology* **480**, 75-88.
- Smith, A. B., Pisani, D., Mackenzie-Dodds, J. A., Stockley, B., Webster, B. L., and Littlewood, T. J.** (2006). Testing the molecular clock: molecular and paleontological estimates of divergence times in the Echinoidea (Echinodermata). *Molecular biology and evolution* **23**, 1832-1851.
- Snell-Rood, E. C.** (2013). An overview of the evolutionary causes and consequences of behavioural plasticity. *Animal Behaviour* **85**, 1004-1011.

- Soars, N. A., Prowse, T. A. A. and Byrne, M.** (2009). Overview of phenotypic plasticity in echinoid larvae, 'Echinopluteus transversus' type vs. typical echinoplutei. *Marine Ecology Progress Series* **383**, 113-125.
- Steiner, U. and Van Buskirk, J.** (2008). Environmental stress and the costs of whole-organism phenotypic plasticity in tadpoles. *Journal of evolutionary biology* **21**, 97-103.
- Strathmann, R. R., Fenaux, L. and Strathmann, M. F.** (1992). Heterochronic developmental plasticity in larval sea urchins and its implications for evolution of nonfeeding larvae. *Evolution* **46**, 972-986.
- Tsuji, H., Taoka, K. and Shimamoto, K.** (2011). Regulation of flowering in rice: two florigen genes, a complex gene network, and natural variation. *Current opinion in plant biology* **14**, 45-52.
- Van Buskirk, J. and Steiner, U.** (2009). The fitness costs of developmental canalization and plasticity. *Journal of evolutionary biology* **22**, 852-860.
- Van Kleunen, M. and Fischer, M.** (2005). Constraints on the evolution of adaptive phenotypic plasticity in plants. *New Phytologist* **166**, 49-60.
- Williamson, D.** (2003). *The origins of larvae*. Berlin, Germany: Springer Science & Business Media.
- Zigler, K. S. and Lessios, H.** (2004). Speciation on the coasts of the new world: phylogeography and the evolution of bindin in the sea urchin genus *Lytechinus*. *Evolution* **58**, 1225-1241.

## **Acknowledgements**

We are grateful for discussions with R. Range and A. Sethi. Support for this research was provided by Rutgers, the State University of New Jersey.

## **Authors Contributions**

E.Y.C. led the execution of the experiments and data analysis, and contributed to manuscript preparation. D.K.A. led the design of the experiments, supervised execution of the experiments and data analysis, and contributed to manuscript preparation.

**Competing financial interests:** The authors declare no competing financial interests.

## NEUROSENSATION DRIVES PLASTICITY

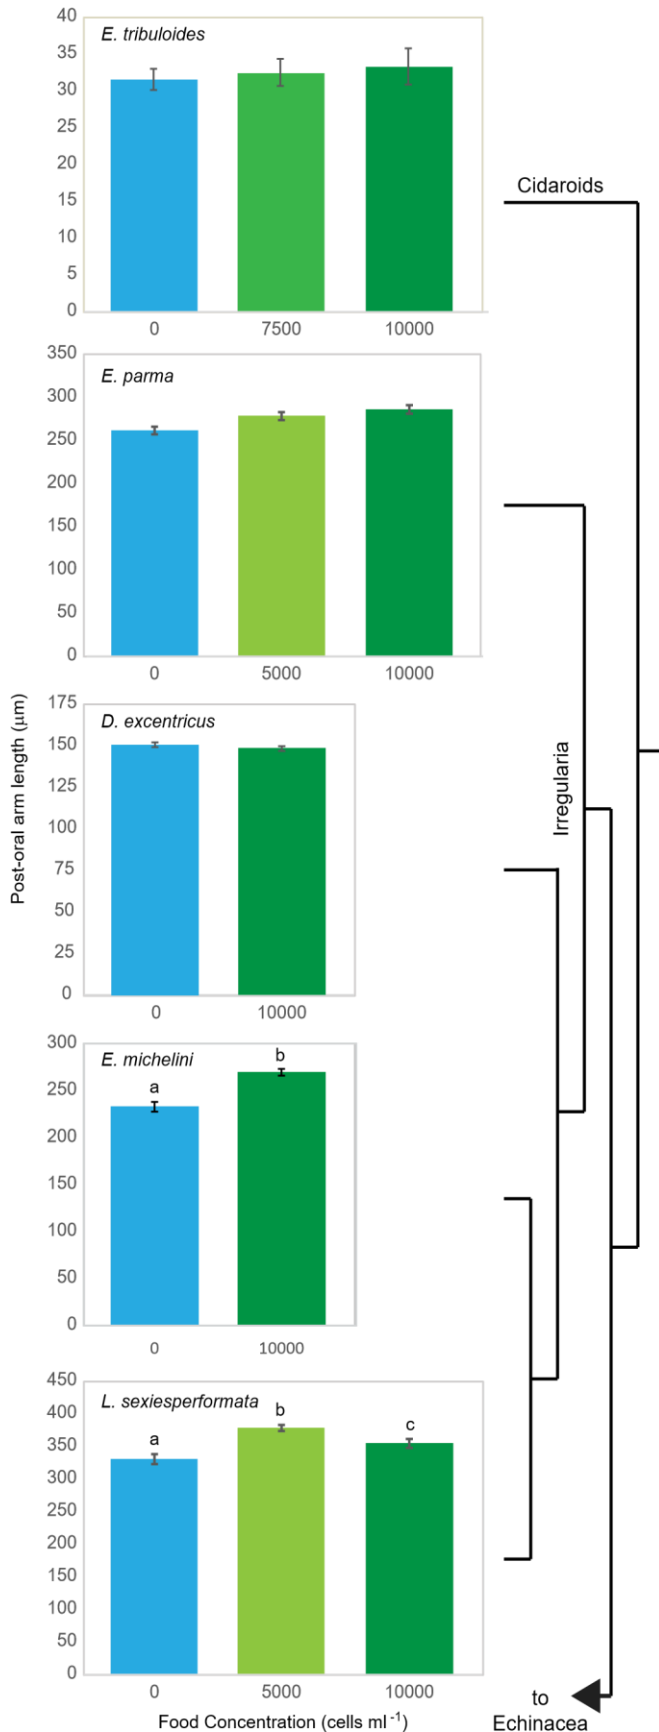

**Figure 1: Canonical pre-feeding plasticity is absent in the basal Cidaroids and irregular urchins.** Change in post-oral arm length at initiation of feeding averaged across families with food concentration in the Cidaroids and Irregularia. Phylogenetic tree is not scaled to divergence. Error bars,  $\pm$  standard error of the mean. Letters denote a significant difference between food treatments at  $p < 0.05$  (Table 1).

## NEUROSENSATION DRIVES PLASTICITY

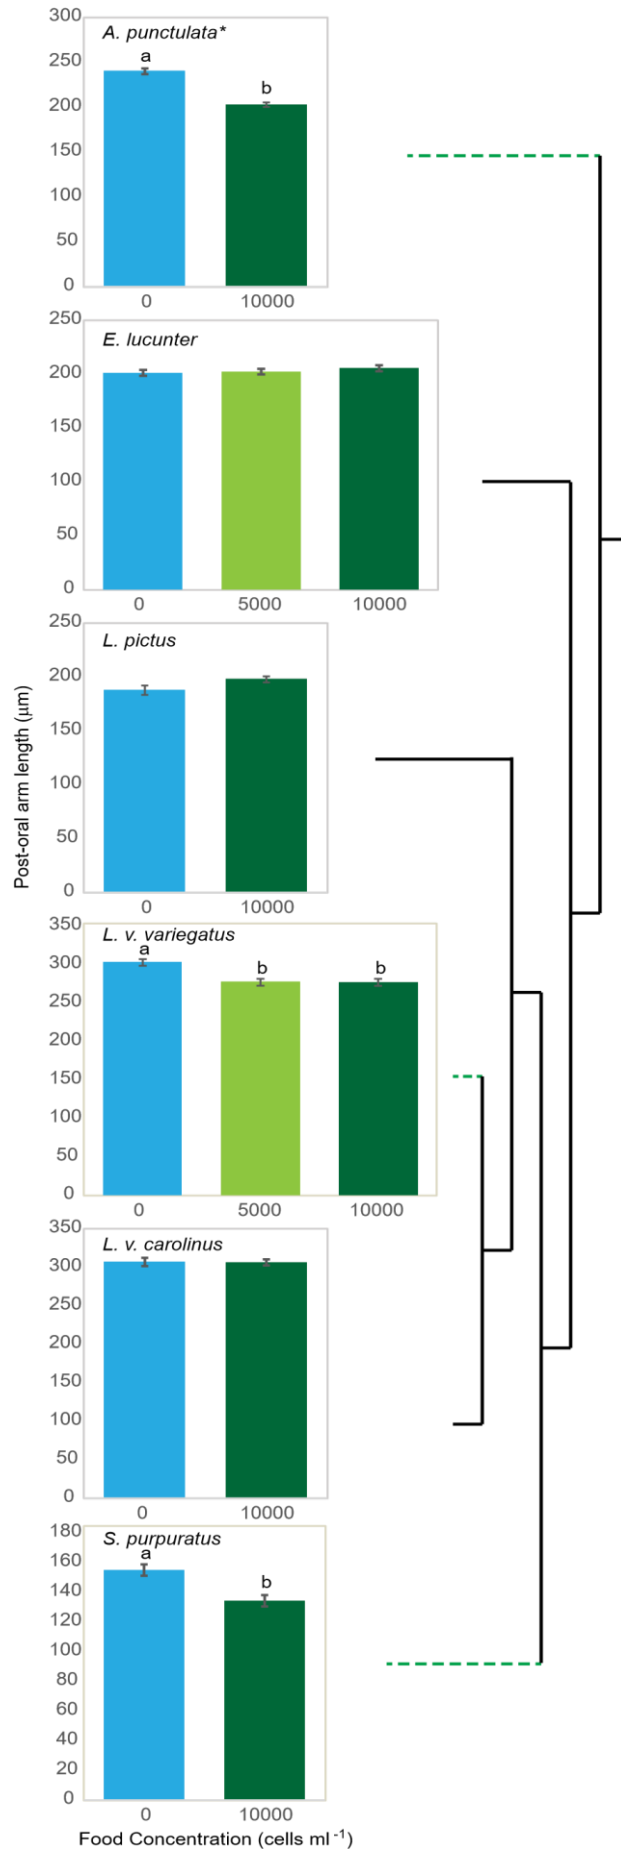

**Figure 2: Pre-feeding plasticity has dynamically evolved within the regular urchins.** Change in post-oral arm length at initiation of feeding averaged across families with food concentration in Echinacea, the regular urchins. \*Data from a single family of *A. punctulata* is presented for clarity, though food treatment was significant across all families tested (Table 2). Phylogenetic tree is not scaled to divergence. Green dotted lines denote taxa with canonical pre-feeding plasticity. Error bars,  $\pm$  standard error of the mean. Letters denote a significant difference between food treatments at  $p < 0.05$  (Table 2).



## NEUROSENSATION DRIVES PLASTICITY

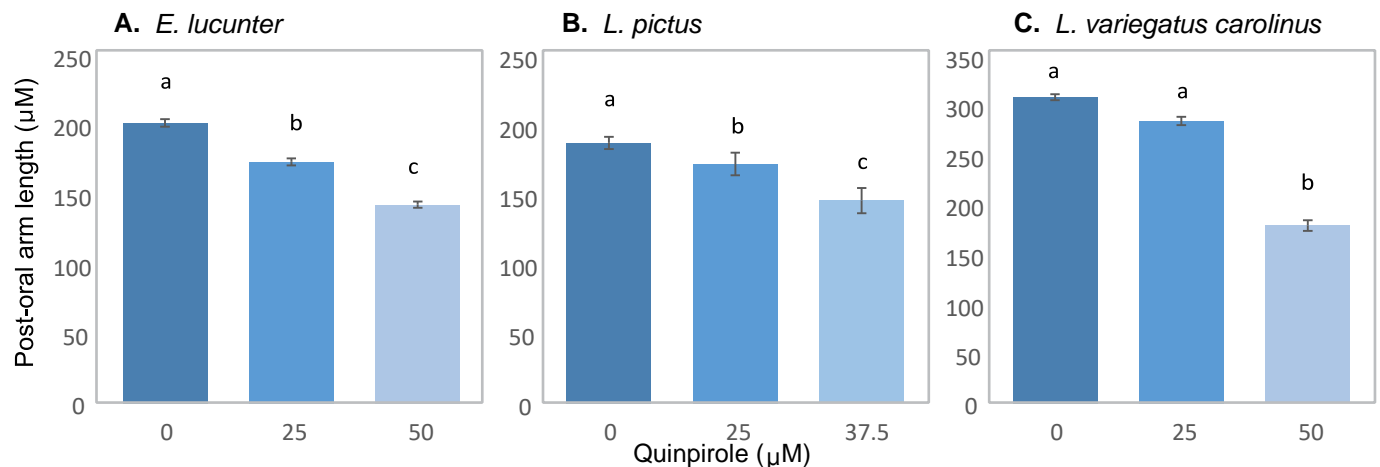

**Figure 3. Regular urchins without phenotypic plasticity retain the phenotypic response to dopamine receptor activation.** Change in post-oral arm length at initiation of feeding with treatment of the dopamine type-2 receptor agonist, Quinpirole, at varying concentrations for the three regular urchins, *E. lucunter* (A;  $F_{2,348} = 124.996$ ,  $p < 0.001$ ), *L. pictus* (B;  $F_{2,96} = 38.662$ ,  $p < 0.001$ ), and *L. variegatus carolinus* (C;  $F_{2,100} = 290.433$ ,  $p < 0.001$ ) lacking a phenotypic response to food (Figure 2). Error bars,  $\pm$  standard error of the mean. Letters denote significant post-hoc Bonferroni comparisons between Quinpirole treatments,  $p < 0.05$ .

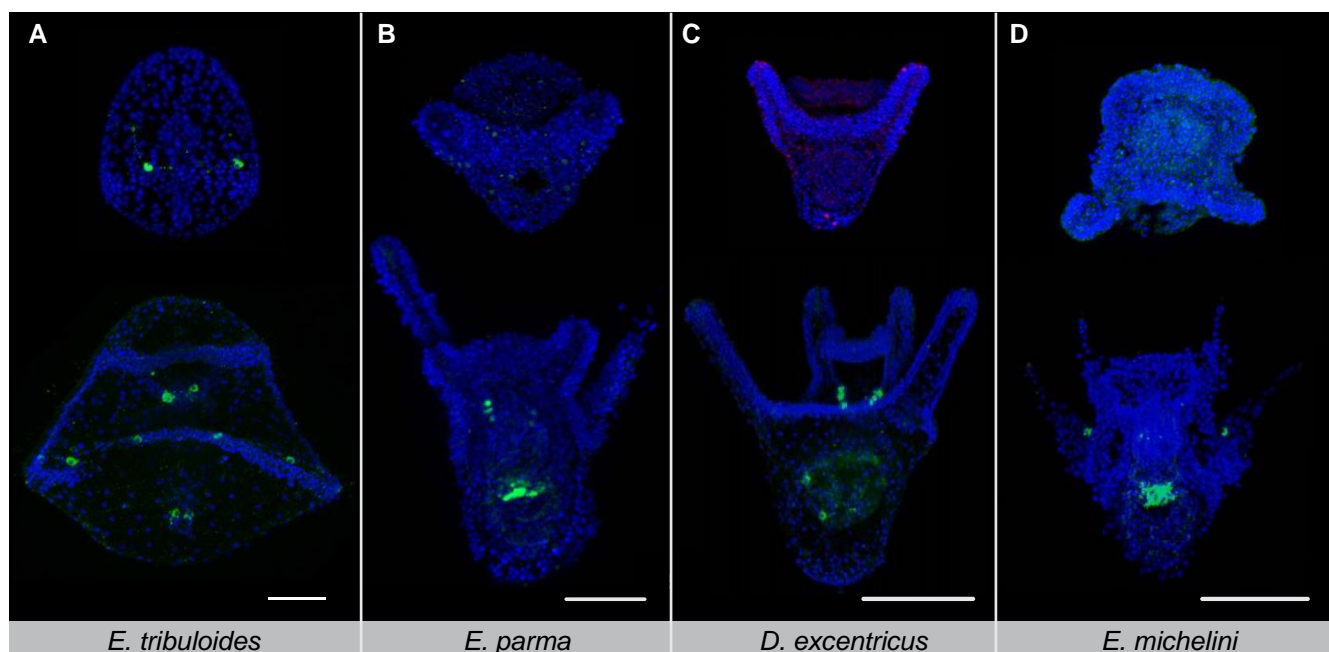

**Figure 4:** Dopaminergic development in the lateral ganglia was ancestrally present then lost. Immunodetection of the dopamine biosynthesis enzyme tyrosine hydroxylase (green) at prism or early pluteus stage (top row) and after feeding starts (bottom row) for the cidaroid, *E. tribuloides* (A), and irregular urchins, *E. parma* (B), *D. excentricus* (C), and *E. michelini* (D). DAPI counterstain, Blue. Scale bar, 100 μm for all images.

## NEUROSENSATION DRIVES PLASTICITY

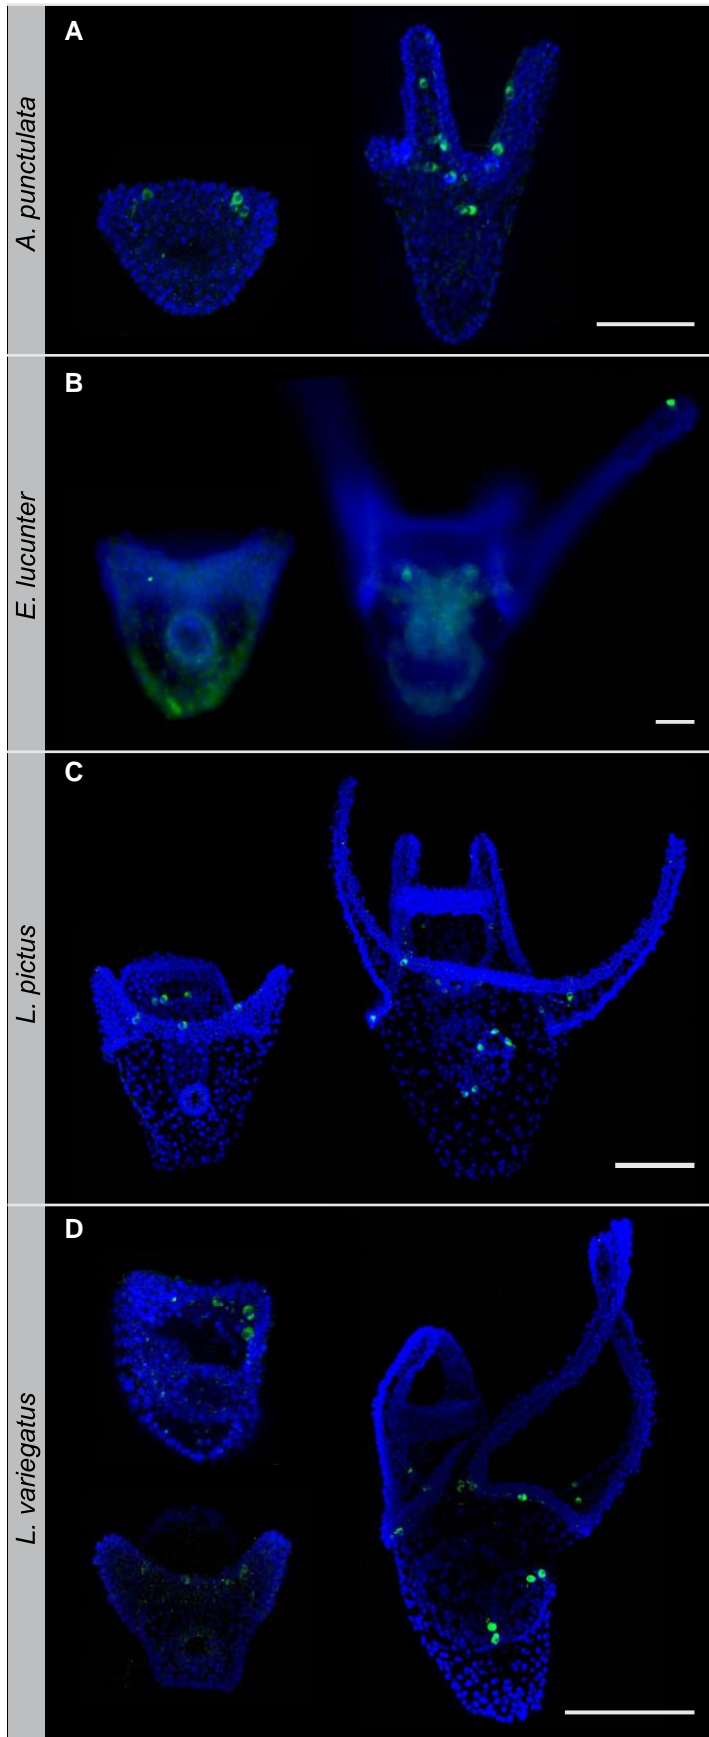

**Figure 5: Dopamine neurons develop in the lateral ganglia occurs in most regular urchins.** Immunodetection of the dopamine biosynthesis enzyme tyrosine hydroxylase (green) at prism or early pluteus stage (left) and after feeding starts (right) for the regular urchins, *A. punctulata* (A), *E. lucunter* (B), *L. pictus* (C), and the *L. variegatus* subsp. (D). The prism stage is shown for *L. variegatus carolinus* (top) and *L. variegatus variegatus* (bottom). DAPI counterstain, Blue. Scale bar, 100  $\mu$ m all images.

## NEUROSENSATION DRIVES PLASTICITY

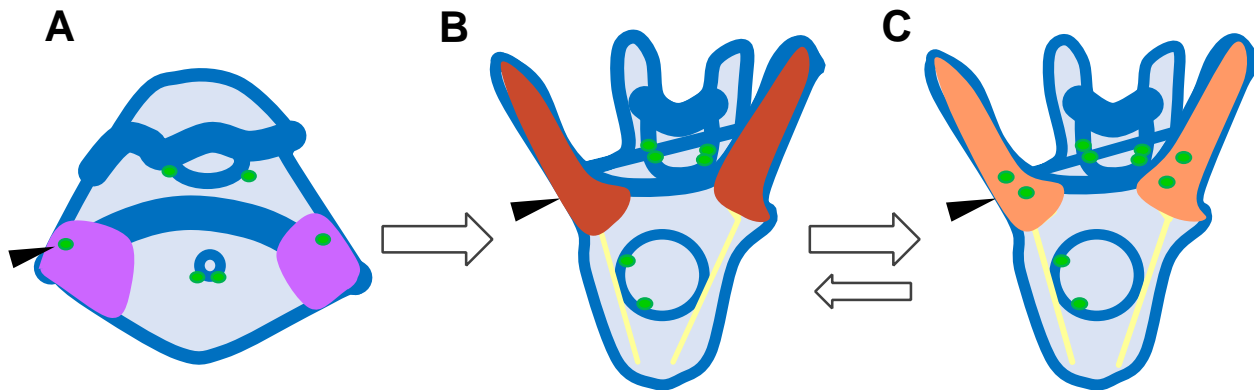

**Figure 6. Model for the evolution of post-oral arm elongation and dopaminergic development.** The change in the signaling milieu [pink (A) to red (B)] that allowed for earlier elongation of the post-oral arms likely also inhibited the early development of dopaminergic neurons (green circles) in the lateral ganglia (black arrows). Another shift in signaling or relaxation of pleiotropy at the base of the regular urchins restored early dopaminergic development (C). Dynamic evolution within the regular urchins suggests that there may also be shifts back to the prior evolutionary state (B).

NEUROSENSATION DRIVES PLASTICITY

**Table 1: Two-factor ANCOVAs with body rod (BR) as a covariate for irregular urchins.**

|               | <i>E. parma</i>                       |              | <i>D. excentricus</i>                 |              | <i>L. sexiesperforata</i>              |              |
|---------------|---------------------------------------|--------------|---------------------------------------|--------------|----------------------------------------|--------------|
| Source        | F statistic                           | p value      | F statistic                           | p value      | F statistic                            | p value      |
| Family        | $F_{1,213} = 0.250$                   | 0.618        | <b><math>F_{1,115} = 8.663</math></b> | <b>0.004</b> | $F_{1,125} = 1.757$                    | 0.187        |
| Food          | $F_{2,213} = 1.434$                   | 0.241        | $F_{1,115} = 1.010$                   | 0.316        | <b><math>F_{2,125} = 15.697</math></b> | <b>0.000</b> |
| Family x Food | <b><math>F_{2,213} = 7.561</math></b> | <b>0.001</b> | <b><math>F_{1,115} = 5.895</math></b> | <b>0.016</b> | <b><math>F_{2,125} = 4.107</math></b>  | <b>0.019</b> |
| BR            | $F_{1,213} = 1.695$                   | 0.194        | $F_{1,115} = 0.069$                   | 0.793        | <b><math>F_{1,125} = 24.065</math></b> | <b>0.000</b> |

**Table 2: Two-factor ANOVAs with body rod (BR) as a covariate for regular urchins.**

|               | <i>A. punctulata</i>                    |              | <i>E. lucunter</i>                     |              | <i>L. pictus</i>   |         |
|---------------|-----------------------------------------|--------------|----------------------------------------|--------------|--------------------|---------|
| Source        | F statistic                             | p value      | F statistic                            | p value      | F statistic        | p value |
| Family        | <b><math>F_{3,336} = 163.095</math></b> | <b>0.000</b> | <b><math>F_{1,345} = 16.847</math></b> | <b>0.000</b> | $F_{2,86} = 0.320$ | 0.727   |
| Food          | <b><math>F_{1,336} = 6.003</math></b>   | <b>0.015</b> | $F_{2,345} = 1.046$                    | 0.352        | $F_{1,86} = 3.664$ | 0.059   |
| Family x Food | <b><math>F_{3,336} = 6.734</math></b>   | <b>0.000</b> | $F_{2,345} = 2.103$                    | 0.124        | $F_{2,86} = 0.223$ | 0.801   |
| BR            | <b><math>F_{1,336} = 26.944</math></b>  | <b>0.000</b> | <b><math>F_{1,345} = 8.628</math></b>  | <b>0.004</b> | $F_{1,86} = 0.610$ | 0.437   |

  

|               | <i>L. v. variegatus</i>                |              | <i>L. v. carolinus</i>                |              |
|---------------|----------------------------------------|--------------|---------------------------------------|--------------|
| Source        | F statistic                            | p value      | F statistic                           | p value      |
| Family        | <b><math>F_{1,256} = 8.837</math></b>  | <b>0.003</b> | <b><math>F_{1,67} = 19.445</math></b> | <b>0.000</b> |
| Food          | <b><math>F_{2,256} = 14.362</math></b> | <b>0.000</b> | $F_{1,67} = 0.019$                    | 0.892        |
| Family x Food | <b><math>F_{2,256} = 21.356</math></b> | <b>0.000</b> | $F_{1,67} = 0.002$                    | 0.968        |
| BR            | <b><math>F_{1,256} = 13.757</math></b> | <b>0.000</b> | $F_{1,67} = 0.512$                    | 0.477        |
